# Supplementary material
Source: PubMed Central journal article supplement (PMC4863664)
Supplement: mmc2.pdf [file mmc2.pdf]

# A Syndromic Intellectual Disability Disorder Caused by Variants in *TELO2*, a Gene Encoding a Component of the TTT Complex

Jing You,<sup>1,2</sup> Nara L. Sobreira,<sup>2,3</sup> Dustin L. Gable,<sup>1,2,5,6</sup> Julie Jurgens,<sup>1,2</sup> Dorothy K. Grange,<sup>4</sup> Newell Belnap,<sup>7,8</sup> Ashley Siniard,<sup>7,8</sup> Szabolcs Szelinger,<sup>7,8</sup> Isabelle Schrauwen,<sup>7,8</sup> Ryan F. Richholt,<sup>7,8</sup> Stephanie E. Vallee,<sup>9</sup> Mary Beth P. Dinulos,<sup>9,10</sup> David Valle,<sup>2,3,\*</sup> Mary Armanios,<sup>2,6</sup> and Julie Hoover-Fong<sup>2,3,11</sup>

The proteins encoded by *TELO2*, *TTI1*, and *TTI2* interact to form the TTT complex, a co-chaperone for maturation of the phosphatidylinositol 3-kinase-related protein kinases (PIKKs). Here we report six affected individuals from four families with intellectual disability (ID) and neurological and other congenital abnormalities associated with compound heterozygous variants in *TELO2*. Although their fibroblasts showed reduced steady-state levels of *TELO2* and the other components of the TTT complex, PIKK functions were normal in cellular assays. Our results suggest that these *TELO2* missense variants result in loss of function, perturb TTT complex stability, and cause an autosomal-recessive syndromic form of ID.

## Introduction

Early-onset intellectual disability (ID) describes a common (incidence 1%–3% in the Western world) and highly heterogeneous group of phenotypes.<sup>1–3</sup> It is estimated that variants in >1,000 genes result in the autosomal-recessive forms of ID.<sup>3</sup> Customarily, ID is divided into two categories: syndromic forms in which the intellectual problems occur together with a constellation of other phenotypic features and non-syndromic forms in which the only constant manifestation is ID. In practice, this distinction is often difficult to make until a large number of individuals with variants in the same gene are well phenotyped.<sup>3</sup>

*TELO2* (MIM: 611140) is the human ortholog of *Tel2*, an *S. cerevisiae* gene identified in a screen for genes involved in maintenance of telomere length.<sup>4,5</sup> Located at 16p13.3, *TELO2* has 21 exons and encodes an 837 amino acid protein that interacts physically with *TELO2* interacting proteins 1 and 2 (*TTI1* and *TTI2*) to form the TTT complex.<sup>6</sup> Homozygosity for a *Telo2* knockout allele in mice produces embryonic lethality and S phase cell-cycle arrest in mouse embryonic fibroblasts (MEFs). Mice heterozygous for the *Telo2* null allele are viable, fertile, and apparently healthy.<sup>7</sup>

The TTT complex interacts with Hsp90 and the R2TP complex forming a supercomplex that acts as a co-chaperone for maturation of a set of six phosphatidylinositol 3-kinase-related protein kinases (PIKKs).<sup>6–9</sup> The PIKKs are

involved in a variety of key cellular processes, including the double strand DNA breakage response (*ATM* [MIM: 607585], *PRKDC* [MIM: 600899]),<sup>10–12</sup> DNA replication stress (*ATR* [MIM: 601215]),<sup>10,11</sup> growth response to nutrient availability (*MTOR* [MIM: 601231]),<sup>13</sup> nonsense-mediated RNA decay (*SMG1* [MIM: 607032]),<sup>14,15</sup> and epigenetic modifications through regulation of histone acetylation (*TRRAP* [MIM: 603015]).<sup>16,17</sup> Genetically mediated deficiency of various PIKK proteins is associated with specific disease phenotypes: pathogenic biallelic variants in *ATM* cause ataxia telangiectasia (MIM: 208900),<sup>18</sup> those in *ATR* cause Seckel syndrome 1 (MIM: 210600),<sup>19</sup> and those in *PRKDC* result in immunodeficiency 26 (IMD26 [MIM: 615966]).<sup>12,20</sup> Heterozygosity for missense variants in *MTOR* have been associated with ID, megalencephaly, and dysmorphic facial features.<sup>21,22</sup> Deregulation in the mTOR pathway is associated with certain cancer syndromes,<sup>23</sup> and pathogenic variants in the mTOR interactor *TSC1* (MIM: 605284) cause tuberous sclerosis-1 (MIM: 191100), a disorder characterized by abnormally regulated cellular growth.<sup>13</sup> Somatic *TRRAP* variants have been associated with melanoma<sup>24</sup> and in mice, homozygosity for a *Trrap*-null variant results in early embryonic lethality.<sup>25,26</sup>

Here we report six individuals from four families with ID and assorted neurological and physical abnormalities. All individuals are compound heterozygotes for rare variants (five missense and one complex allele consisting of a nonsense and splice site variant) in *TELO2*. Our results

<sup>1</sup>Predoctoral Training Program in Human Genetics, Johns Hopkins University School of Medicine, Baltimore, MD 21205, USA; <sup>2</sup>McKusick-Nathans Institute of Genetic Medicine, Johns Hopkins University School of Medicine, Baltimore, MD 21205, USA; <sup>3</sup>Department of Pediatrics, Johns Hopkins University School of Medicine, Baltimore, MD 21205, USA; <sup>4</sup>Department of Pediatrics, Washington University School of Medicine, St. Louis, MO 63110, USA; <sup>5</sup>Medical Scientist Training Program, Johns Hopkins University School of Medicine, Baltimore, MD 21205, USA; <sup>6</sup>Department of Oncology, Johns Hopkins University School of Medicine, Baltimore, MD 21205, USA; <sup>7</sup>Translational Genomics Research Institute (TGen) Center for Rare Childhood Disorders, Phoenix, AZ 85004, USA; <sup>8</sup>Neurogenomics Division, Translational Genomics Research Institute (TGen), Phoenix, AZ 85004, USA; <sup>9</sup>Dartmouth-Hitchcock Medical Center, 1 Medical Center Dr., Lebanon, NH 03756, USA; <sup>10</sup>Pediatrics and Pathology Department, Geisel School of Medicine at Dartmouth, 1 Medical Center Dr., Lebanon, NH 03756, USA; <sup>11</sup>Greenberg Center for Skeletal Dysplasias, McKusick-Nathans Institute of Genetic Medicine, Johns Hopkins University School of Medicine, Baltimore, MD 21287, USA

\*Correspondence: [dvalle@jhmi.edu](mailto:dvalle@jhmi.edu)

<http://dx.doi.org/10.1016/j.ajhg.2016.03.014>

©2016 by The American Society of Human Genetics. All rights reserved.

indicate that variants in *TELO2* are responsible for syndromic ID.

## Material and Methods

### Subjects

Family 1 was recruited from the Johns Hopkins Hospital Genetics Clinic as part of the Baylor-Hopkins Center for Mendelian Genomics (BHCMG) project. Family 2 was recruited through the Washington University Genetics Clinic based on shared abnormalities in *TELO2* detected by clinical WES performed by GeneDx. Family 3 was recruited through the TGEN Center for Rare Childhood Disorders. Family 4 was recruited through the University of Vermont Genetics Clinic after clinical WES performed at GeneDx and subsequent matching of *TELO2* as a candidate causative gene through entry into GeneMatcher.<sup>27</sup> Our study was approved by the Johns Hopkins Medicine Institutional Review Board and by the IRBs of the other participating institutions. We obtained informed consent from responsible individuals in all four families.

### Whole-Exome Sequencing and Analysis

For family 1, we captured the CCDS exonic regions and flanking intronic regions totaling ~51 Mb by using the Agilent SureSelect XT kit and performed paired end 100 bp reads with the Illumina HiSeq2500 platform. We aligned each read to the 1000 Genomes phase 2 (GRCh37) human genome reference with the Burrows-Wheeler Alignment (BWA) v.0.5.10-tpx.<sup>28</sup> Local realignment around indels and base call quality score recalibration were performed with the Genome Analysis Toolkit (GATK)<sup>29</sup> v.2.3-9-ge5ebf34. Variant filtering was done via the Variant Quality Score Recalibration (VQSR) method.<sup>30</sup> For SNVs, the annotations of MQRankSum, HaplotypeScore, QD, FS, MQ, and ReadPosRankSum were used in the adaptive error model (6 max Gaussians allowed, worst 3% used for training the negative model). HapMap3.3<sup>31</sup> and Omni2.5 were used as training sites with HapMap3.3 used as the truth set. SNVs were filtered to obtain all variants up to the 99<sup>th</sup> percentile of truth sites (1% false negative rate). For indels, the annotations of QD, FS, HaplotypeScore, and ReadPosRankSum were used in the adaptive error model (4 max Gaussians allowed, worst 12% used for training the negative model, indels that had annotations more than 10 SD from the mean were excluded from the Gaussian mixture model). A set of curated indels obtained from the GATK resource bundle (Mills\_and\_1000G\_gold\_standard.indels.b37.vcf) were used as training and truth sites. Indels were filtered to obtain all variants up to the 95<sup>th</sup> percentile of truth sites (5% false negative rate). Using the PhenoDB Variant Analysis Tool of PhenoDB,<sup>27</sup> we prioritized rare functional variants (missense, nonsense, splice site variants, and indels) that were homozygous or compound heterozygous in all three affected subjects and excluded variants with a minor allele frequency (MAF) > 0.01 in dbSNP 126, 129, and 131, the Exome Variant Server (release ESP6500SI-V2), or 1000 Genomes Project.<sup>33–35</sup> We also excluded all variants found in our in-house controls (CIDRVar 51Mb). We generated lists of homozygous and compound heterozygous variants shared by the affected siblings but heterozygous in the unaffected parents.

For families 2 and 4, clinical WES was performed at GeneDx. Candidate variants were validated by Sanger sequencing of PCR amplified products of genomic DNA. Annotated variants are based on RefSeq transcript GenBank: NM\_016111.3 and NCBI human genome assembly build 37.

For family 3, WES was performed at TGEN and variants validated by Sanger sequencing.

### Telomere Length, Colony Survival, and Mitomycin Sensitivity Assays

Telomere length was measured on peripheral blood lymphocytes by flow cytometry and fluorescence in situ hybridization as previously described.<sup>36</sup> Diepoxybutane testing was performed per standard procedure on fresh blood as described.<sup>37</sup> EBV-transformed lymphoblastoid cell lines were generated as described.<sup>38</sup> Modified colony survival was performed as described,<sup>39</sup> and cells were counted on day 8 after irradiation (CK04-01, Dojindo Molecular Technologies). The final surviving fraction was calculated by dividing absorbance at 0.5–2.0 Gy for each sample by absorbance at 0 Gy. Mitomycin C sensitivity was examined as described.<sup>40</sup>

### Immunoblot and Quantitative RT-PCR

We performed immunoblot assays on protein extracted from lymphoblastoid cells and fibroblasts via standard procedures.<sup>32</sup> Antibody sources and concentrations were as follows: TTI2 (1:1,000; Bethyl cat# A303-476A; RRID: AB\_10948973), TTI1 (1:2,000; Bethyl cat# A303-451A; RRID: AB\_10953982), *TELO2* (1:2,000; Proteintech cat# 15975-1-AP; RRID: AB\_22033337), ATM (1:1,000; Novus Biologicals cat# NB110-55475; RRID: AB\_837630), ATR N-19 (1:1,000; Santa Cruz cat# sc-1887; RRID: AB\_630893), PRKDC (1:1,000, Thermo Scientific cat# MS-423-P0), mTOR (1:1,000; Cell Signaling cat# 2983; RRID: AB\_10830890), SMG1 (1:1,000; Cell Signaling cat# 9592; RRID: AB\_2192936), TRRAP (1:1,000; Cell Signaling cat# 3967; RRID: AB\_2209656), and  $\beta$ -actin (1:20,000; Ambion cat# AM4302; RRID: AB\_437394). We incubated the membranes with horseradish peroxidase labeled secondary antibodies (goat anti-rabbit IgG-HRP antibody [Santa Cruz cat# sc-2004; RRID: AB\_631746] or goat anti-mouse IgG-HRP antibody [Santa Cruz cat# sc-2031; RRID: AB\_631737]) diluted 1:20,000, developed the exposed film in a Kodack X-OMAT processor, and analyzed signal intensities with ImageJ software.

To inhibit fibroblast Hsp90, we added 17-allylamino-17-desmethoxygeldanamycin (17-AAG) (Sigma) to the culture medium for the indicated time points and concentrations.<sup>41</sup> For quantitative RT-PCR, we isolated total RNA from fibroblasts using Trizol (GIBCO) and subjected 1.25  $\mu$ g of total cellular RNA to reverse transcription using qScript cDNA SuperMix system (Quanta Biosciences, #95048-100) and PerfeCta SYBR Green FastMix, Rox (95073-012) according to the manufacturer's protocol. We performed qRT-PCR for *TELO2* mRNA in triplicate and normalized to three control genes, *GAPDH*, *HPRT*, and *YWHA4*.

## Results

### Identification of Variants in *TELO2*

Initially, we identified a single non-consanguineous family (family 1) with three non-ambulatory teenage sibs, all with severe ID, visual and hearing impairments, abnormal movements, and structural abnormalities of the great vessels. Subsequently, we identified three additional unrelated singletons in non-consanguineous families, all with severe ID and clinical features partially overlapping those of the affected individuals in family 1 (Figure 1, Table 1, and the case reports in Supplemental Data). Whole-exome sequencing (WES) of the affected individuals and their

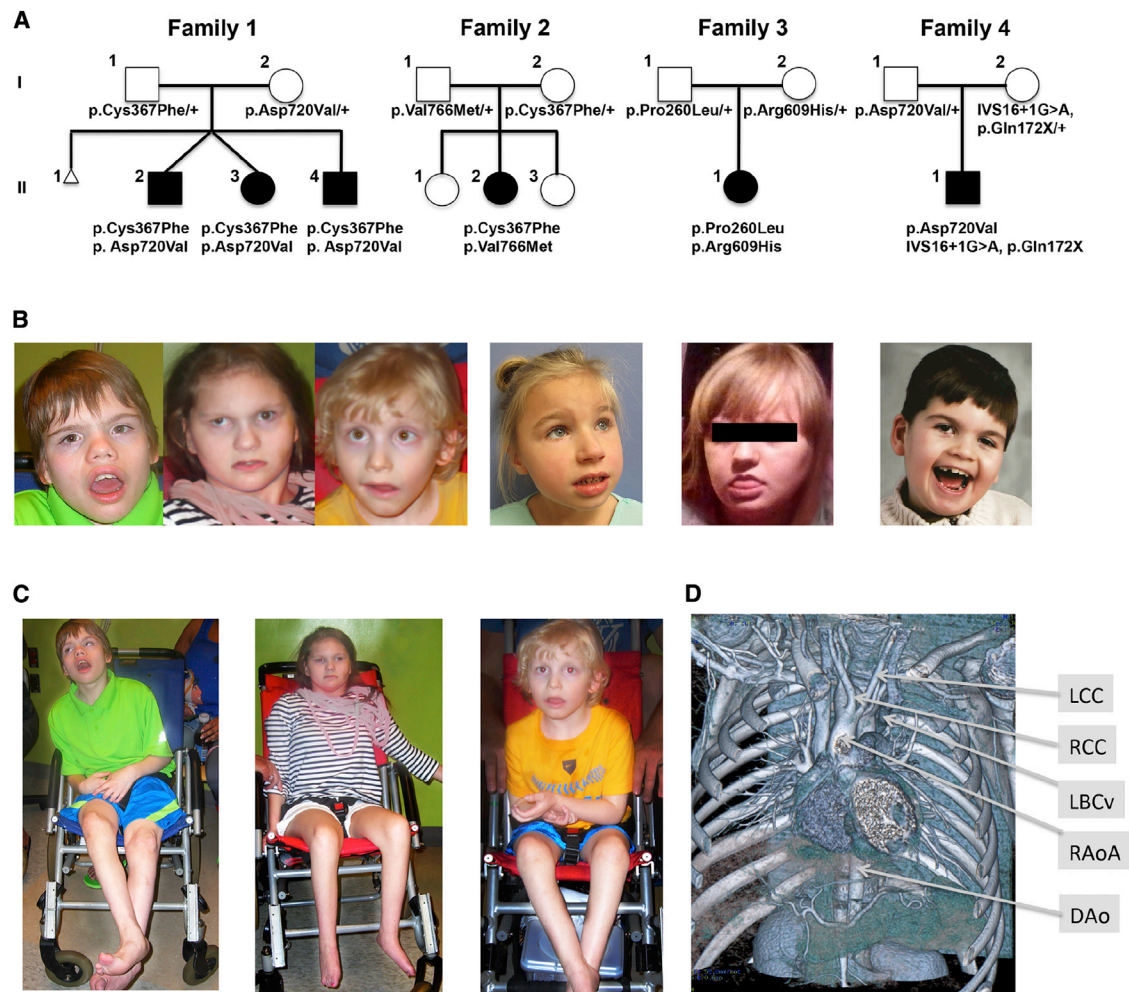

**Figure 1. Clinical Phenotype of Individuals with *TELO2* Variants**

(A) The pedigrees of families 1–4. The *TELO2* genotype segregating in each family is shown. Individual II-1 in family 4 has an unaffected paternal half-sibling (not shown).

(B) Current portraits of each affected individual.

(C) Full body pictures of affected individuals in family 1.

(D) Coronal view of chest CT angiogram of II-2 in family 1 showing an incomplete vascular ring with a right ascending aortic arch (RAoA), right common carotid artery (RCC), left common carotid artery (LCC), and descending aorta (DAo). There are also venous anomalies with a retroaortic left brachiocephalic vein (LBCv) that joins the azygous vein and enters the superior vena cava.

parents in family 1 identified rare compound heterozygous missense variants in *TELO2*: c.1100G>T (p.Cys367Phe) in exon 8 and c.2159A>T (p.Asp720Val) in exon 18 (variant annotation based on RefSeq transcript GenBank: NM\_016111.3). These *TELO2* variants were the only ones that met our analytic criteria of rare, function-altering alleles in compound heterozygosity or homozygosity present in all three affected siblings. The mother and father are heterozygous for the p.Asp720Val and p.Cys367Phe variants, respectively (Figure 2A). We validated these variants by Sanger sequencing (Figure S1). Both variants are rare: p.Asp720Val is not reported in the 1000 Genomes Project (2,577 samples, build 20130502, accessed November 2015),<sup>34</sup> dbSNP build 131,<sup>43</sup> Exome Variant Server release ESP6500SI-V2 (6,503 samples, accessed November 2015), or Exome Aggregation Consortium (ExAC) database (60,706 samples, accessed November 2015); and p.Cys367Phe is ab-

sent from the 1000 Genomes Project and Exome Variant Server and has an allele frequency of 0.01959% in the ExAC database and is not described in homozygosity. Both variants are likely to be damaging: p.Cys367Phe is in the N-terminal domain of *TELO2* and alters a residue conserved among representative vertebrates (Figure 2B) with a PolyPhen-2 score of 0.997 (probably damaging, score range 0 [benign] to 1.0 [probably damaging])<sup>44</sup> and SIFT score of 0.01 (scores  $\leq$  0.05 predicted damaging, damaging, score range 0–1.0<sup>45,46</sup>); p.Asp720Val falls in the C-terminal domain of *TELO2* and is also highly conserved, with PolyPhen-2 and SIFT scores of 1 and 0, respectively.

The affected individuals in families 2, 3, and 4 are also compound heterozygotes for rare *TELO2* variants. The proband in family 2 is heterozygous for c.1100G>T (p.Cys367Phe), the same variant observed in family 1, and a rare heterozygous missense variant



**Table 1. Phenotypic Features of Individuals with *TELO2* Variants**

| Family ID                    | Family 1                                                 |                                                                 |                          | Family 2                 | Family 3                 | Family 4                         |
|------------------------------|----------------------------------------------------------|-----------------------------------------------------------------|--------------------------|--------------------------|--------------------------|----------------------------------|
| Subject                      | II-2                                                     | II-3                                                            | II-4                     | II-2                     | II-1                     | II-1                             |
| Age (years)                  | 17                                                       | 17                                                              | 10                       | 6                        | 17                       | 9                                |
| Intellectual disability      | +                                                        | +                                                               | +                        | +                        | +                        | +                                |
| Microcephaly                 | +                                                        | +                                                               | +                        | +                        | +                        | +                                |
| Hearing loss                 | +                                                        | +                                                               | +                        | -                        | -                        | -                                |
| Cortical visual impairment   | +                                                        | +                                                               | +                        | -                        | -                        | +                                |
| Oral frenuli/ankyloglossia   | -                                                        | +                                                               | +                        | -                        | -                        | -                                |
| Cleft palate                 | -                                                        | +                                                               | -                        | -                        | -                        | -                                |
| Congenital heart disease     | +, double aortic arch, vascular ring, cleft mitral valve | +, double aortic arch, atretic L arch, incomplete vascular ring | +, coarctation of aorta  | -                        | -                        | -                                |
| Kyphoscoliosis/scoliosis     | -                                                        | +                                                               | -                        | -                        | +                        | +                                |
| Brachydactyly & clinodactyly | +                                                        | +                                                               | +                        | -                        | -                        | clinodactyly                     |
| 4/5 toe syndactyly           | +                                                        | +                                                               | +                        | -                        | -                        | -                                |
| Abnormal balance             | +                                                        | +                                                               | +                        | +                        | +                        | +                                |
| Abnormal sleep pattern       | -                                                        | -                                                               | -                        | +                        | +                        | +                                |
| Laughter outbursts           | +                                                        | -                                                               | -                        | -                        | +                        | +                                |
| Movement disorder            | +                                                        | +                                                               | +                        | +                        | +                        | +                                |
| Seizures                     | -                                                        | -                                                               | -                        | -                        | +                        | -                                |
| Rotatory nystagmus           | -                                                        | +                                                               | -                        | -                        | +                        | -                                |
| <i>TELO2</i> genotype        | c.1100G>T, c.2159A>T                                     | c.1100G>T, c.2159A>T                                            | c.1100G>T, c.2159A>T     | c.1100G>T, c.2296G>A     | c.779C>T, c.1826G>A      | c.2034+1G>A, c.514C>T, c.2159G>A |
| <i>TELO2</i> alteration      | p.Cys367Phe, p.Asp720Val                                 | p.Cys367Phe, p.Asp720Val                                        | p.Cys367Phe, p.Asp720Val | p.Cys367Phe, p.Val766Met | p.Pro260Leu, p.Arg609His | p.Gln172X, p.Asp720Val           |

All major abnormalities present in two or more of the individuals plus selected abnormalities present in only one patient. See [Supplemental Data](#) for case descriptions and specific data.

c.2296G>A (p.Val766Met), which has a minor allele frequency of 0.02283% in the ExAC database and is not reported in homozygosity. p.Val766Met variant alters a highly conserved residue in the C-terminal domain of *TELO2* and has a PolyPhen-2 score of 0.986 (probably damaging) and a SIFT score of 0.02 (damaging) (Figures 1A, 2A, and 2B). This variant is represented in dbSNP build 138 (rs371675497) but lacks an associated allele frequency. The proband in family 3 is a compound heterozygote for two additional *TELO2* variants: c.779C>T (p.Pro260Leu), a substitution with a PolyPhen-2 score of 1 and SIFT score of 0.23, and c.1826G>A (p.Arg609His) with PolyPhen-2 score of 1 and SIFT score of 0. The p.Pro260Leu variant is represented in dbSNP build 138 (rs369656775) without an associated allele frequency, while p.Arg609His is not listed in the dbSNP, 1000 Genomes, EVS, or ExAC databases. The proband in family 4 is a compound heterozygote for p.Asp720Val, the same allele segregating in family 1, and a complex allele, c.514C>T (p.Gln172X) plus c.2034+1G>A (IVS16+1G>A) produc-

ing an aberrantly spliced transcript that is likely subject to nonsense-mediated mRNA decay (NMRD) and encodes a severely C-terminal truncated protein. For these reasons, it is almost certainly a null allele. The fact that this individual's second allele, p.Asp720Val, does not rescue *TELO2* function supports our earlier conclusion for family 1 that this missense variant results in loss of function of *TELO2*.

#### ***TELO2* Variants Reduce Steady-State Levels of *TELO2* Protein**

In preliminary studies, we found that there was no alteration in the levels of *TELO2* mRNA in total cellular RNA isolated from cultured skin fibroblasts of affected individuals in family 1 (Figure S2). To determine the functional consequences of the *TELO2* variants on *TELO2* protein, we first evaluated steady-state levels of *TELO2* and its interacting partners in cultured lymphoblast cell lines (LCLs) and fibroblasts from the affected individuals in family 1. Using immunoblot assays on protein extracts of both cell types, we found that *TELO2* levels were reduced to about 34% of control levels



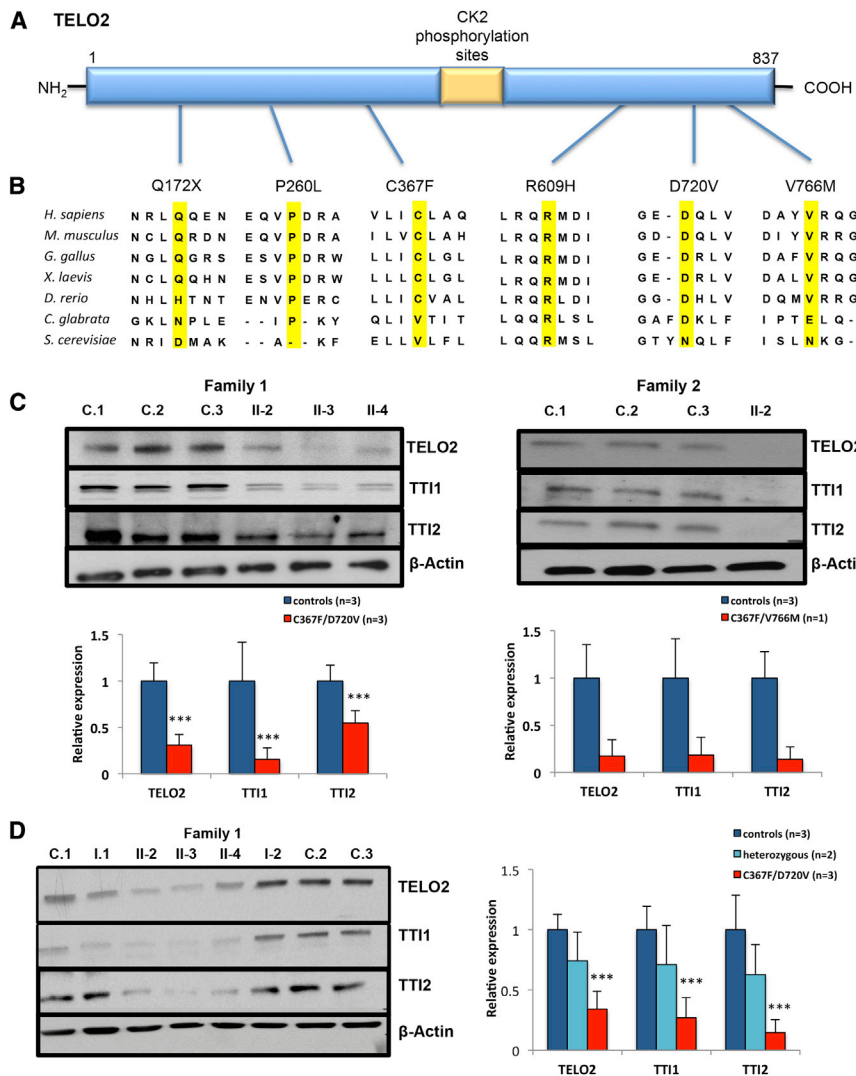

**Figure 2. *TELO2* Variants Affect Steady-State Levels of TTT Complex Components** (A) A schematic of the *TELO2* protein and the location of the missense variants identified in our study.

(B) Evolutionary conservation of the amino acid residues altered by the missense variants in the indicated affected individuals (highlighted in yellow) and the surrounding *TELO2* residues. The species for each sequence is listed on the left. The alignment was determined by ClustalW2 multiple protein alignment.<sup>42</sup>

(C) Immunoblot analysis of TTT complex components in extracts of primary fibroblasts in family 1 and family 2. The left panel shows decreased protein levels of *TELO2*, *TTI1*, and *TTI2* in three affected siblings in family 1 (II-2, II-3, and II-4) and three control subjects (C.1, C.2, and C.3). Left lower panel is the quantification of *TELO2*, *TTI1*, and *TTI2* levels in fibroblast extracts. The error bars show 1 SD around the mean determined in 3 independent experiments as measured by immunoblot analysis. The right panel shows that *TELO2*, *TTI1*, and *TTI2* levels in extracts of skin fibroblast from the proband (II-2) from family 2 were reduced to about 17%, 18%, and 14% of these in controls in 3 independent experiments. The error bar shows 1 SD in three independent Western blots.

(D) Immunoblot analysis of TTT complex in LCLs in family 1. Three controls LCL (C.1, C.2, and C.3) are shown. I-1 and I-2 are the heterozygous parents of the affected individuals in family 1. The three affected individuals in family 1 (II-2, II-3, and II-4) are shown. *TELO2* protein levels were reduced to 31.8% of the mean of control subjects while the levels in the heterozygous parents are reduced to 74% of control subjects ( $p > 0.1$ , Student's *t* test). Similarly, *TTI1* and *TTI2* proteins in the heterozygous parents

of family 1 showed a decrease as compared to control levels which was not statistically significant (for *TTI1*, mean = 70%,  $p > 0.1$ ; for *TTI2*, mean = 62%,  $p > 0.1$ , Student's *t* test). In the affected individuals the level of *TTI1* is reduced to 17% and *TTI2* to 13% of control levels in LCL, respectively ( $p < 0.05$ , Student's *t* test). The error bar shows 1 SD in 3 independent experiments. See also Figure S3.

in LCLs and 33% of control levels in fibroblasts harvested in three separate experiments ( $p < 0.05$ , Student's *t* test, Figures 2C, 2D, and S3). *TELO2* levels in extracts of LCL cells from the heterozygous parents of family 1 were nominally reduced (mean of three measurements = 74%), but this reduction was not statistically significant (Figures 2C and 2D). In family 2, *TELO2* levels in extracts of cultured skin fibroblasts from the proband were reduced to a mean of 17% of those in control samples (3 independent experiments, range 2%–33%, Figures 2C and 2D). Cultured cells from the affected individuals in families 3 and 4 are not available. We conclude from these results that the *TELO2* missense variants in affected individuals from families 1 and 2 destabilize *TELO2*. Although we were not able to make this measurement in the probands of families 3 and 4, they each share at least one missense allele with the affected individuals in families 1 and 2.

### ***TELO2* Alterations Affect Steady-State Levels of *TTI1* and *TTI2***

We next tested the consequence of the *TELO2* variants on steady-state levels of its partner proteins in the TTT complex, *TTI1* and *TTI2*. We found that both proteins were significantly decreased in the affected individuals in family 1 (mean 14.6% and 51.4% of control levels in fibroblast extracts, and mean 27.2% and 14.7% of controls in LCL extracts, respectively,  $p < 0.05$ , Student's *t* test; Figures 2C, 2D, and S3) and in the proband of family 2 (mean 18% and 14% of control levels in fibroblasts, respectively, 3 independent experiments; Figures 2C and 2D). The heterozygous parents in family 1 exhibited a modest reduction that did not reach statistical significance (70% and 63% of *TTI1* and *TTI2*, respectively, in extracts of LCL,  $p > 0.1$ , Student's *t* test, 3 independent experiments; Figure 2D). These results

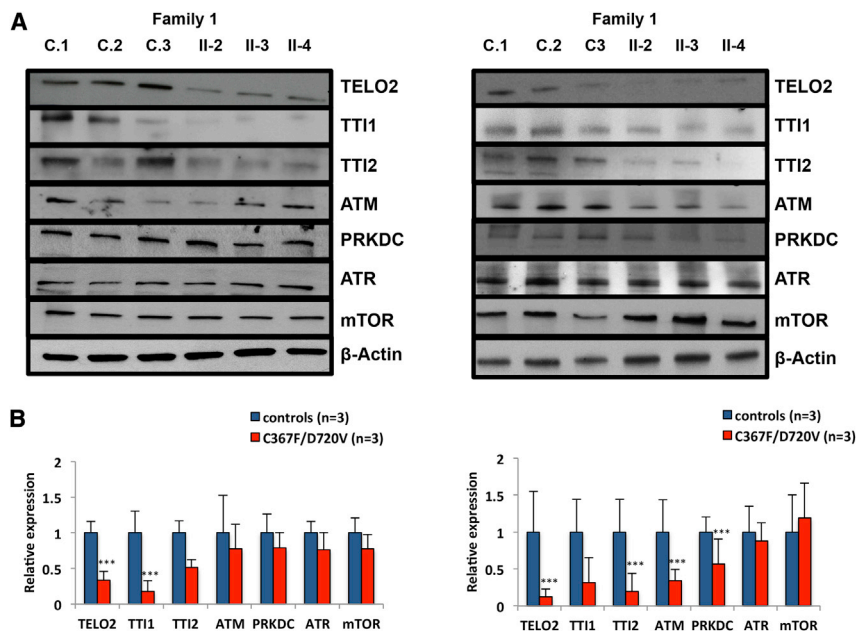

**Figure 3. Effect of Hsp90 Inhibition by 17AAG on Levels of TTT Complex Components and Selected PIKKs**

(A) Representative immunoblots of extracts from cultured skin fibroblasts of affected individuals in family 1 (II-2, II-3, and II-4) and three control subjects (C.1, C.2, and C.3) cultured in standard medium (left) or in medium with 1  $\mu$ M 17AAG for 48 hr (right).

(B) In standard medium (left), the steady-state levels of the TTT complex components and selected PIKKs expressed as percent of the mean of control levels are: TELO2 (33%,  $p < 0.05$ ), TTI1 (18%,  $p < 0.05$ ), TTI2 (51%,  $p = 0.06$ ), ATM (77%,  $p > 0.1$ ), PRKDC (78%,  $p > 0.1$ ), ATR (76%,  $p > 0.1$ ), and mTOR (77%,  $p > 0.1$ ). In medium with 17AAG, the level of protein expression (right) expressed as percent of the mean of control levels are: TELO2 (12%,  $p < 0.05$ ), TTI1 (32%,  $p = 0.056$ ), TTI2 (19.6%,  $p < 0.05$ ), ATM (34%,  $p < 0.05$ ), PRKDC (56%,  $p < 0.05$ ), ATR (87%,  $p > 0.1$ ), and mTOR (111.8%,  $p > 0.1$ ). The error bar indicates 1 SD in three independent experiments (Student's t test).

indicate that the mutations in *TELO2* destabilize the entire TTT complex.

### Consequences of TTT Complex Reduction on the Stability and Function of the PIKKs

The TTT complex is a component of a large protein super-complex that includes an Hsp90 dimer and the R2TP complex comprising RUVBL1 (MIM: 603449) and RUVB2 (MIM: 604788), RPAP3 (MIM: 611477), and PIH1D1 (MIM: 611480).<sup>7,9,47</sup> Although the function of the TTT complex is incompletely understood, available evidence suggests that it is necessary for the folding and stability of newly synthesized PIKKs.<sup>7,47–49</sup> In view of the reduction in TTT complex components in individuals with *TELO2* variants, we next measured the steady-state levels of the PIKK proteins ATM, ATR, PRKDC, mTOR, SMG1, and TRRAP in extracts of LCL cells cultured from the affected individuals in family 1. We found no significant change in the levels in affected individuals and their parents compared to controls (Figure S3). We also tested the functional integrity of DNA repair in cells with compromised TTT complex by assessing de novo sensitivity to ionizing radiation, mitomycin C, and diepoxybutane (not shown) but found no abnormalities (Figures S4 and S5). These results suggest that despite reduction of the components of the TTT complex, *TELO2* mutant cells retain functional integrity of the PIKKs under these conditions. We also measured telomere length by flow cytometry and fluorescence in situ hybridization in primary lymphocytes and granulocytes from the affected individuals and their parents in family 1 and family 2 and found them to be normal (Figure S6). This result is consistent with what has been thought to be a yeast-specific role of *TELO2* in telomere maintenance that is not retained in mammalian cells.<sup>7</sup>

Hsp90 interacts with the TTT and R2TP complexes to facilitate maturation of the PIKKs.<sup>9,49</sup> Accordingly, we asked whether inhibition of Hsp90 would accentuate the reduction in the TTT complex components. We cultured fibroblasts from three normal control subjects and the three affected individuals in family 1 in medium containing 1  $\mu$ M of the Hsp90 inhibitor, 17-allylamino-17-desmethoxygeldanamycin (17AAG), for 48 hr.<sup>49</sup> The reduction of *TELO2* levels we observed in the affected individuals' cells cultured in standard medium was accentuated by culture in the presence of 17AAG (Figure 3A): levels of *TELO2* fell from 33% of control in the absence of 17AAG to 12% of control in the presence of 17AAG (mean values in cultured skin fibroblasts from 3 affected individuals as compared to controls,  $p < 0.05$ , Student's t test). Similarly, the levels of *TTI2* fell from 51% of control levels in the absence of 17AAG to 20% of control levels in the presence of 17AAG. *TTI1* levels as compared to controls were variable, but the mean actually increased from 14.6% to 31.6% (Figure 3B). This reduction in *TELO2* and *TTI2* in cells cultured in the presence of 17AAG was associated with significant decreases in protein levels of ATM and PRKDC (means of 34% and 56%, respectively, of levels in control fibroblasts cultured in 17AAG;  $p < 0.05$ , Student's t test; Figure 3B). The levels of ATR and mTOR were not reduced under these conditions. This result suggests that with the additional stress conferred by inhibition of Hsp90, there is further reduction of the TTT complex in the *TELO2* mutant cells with corresponding negative effects on the abundance of certain PIKKs.

### Discussion

We report six individuals from four unrelated families with overlapping clinical features including global

developmental delay, intellectual disability, dysmorphic facial features, microcephaly, abnormal movements, and abnormal auditory and visual function. In addition, the three affected individuals in family 1 have striking developmental abnormalities of the great vessels, a feature not detected in routine evaluations of the affected individuals in families 2–4. Of these, only the affected individual in family 4 was specifically studied for this phenotype, so it is possible that the others might also have some unrecognized abnormality of great vessel anatomy. Focused phenotypic studies of these and additional individuals will be required to determine whether the incidence of these abnormalities is increased by deficiency of *TELO2* function.

All affected individuals in our series are compound heterozygous for rare variants (five missense affecting conserved residues and one complex null allele) in *TELO2*. The missense variants in families 1 and 2 result in a reduction of the steady-state level of *TELO2* protein in cultured skin fibroblasts and LBLs (Figure 2C). In the available affected individuals' cells from families 1 and 2, the levels of the *TELO2* interacting proteins, TTI1 and TTI2, are also decreased (Figures 2C and 2D). Interestingly, under standard cell culture conditions, we did not observe alterations in the PIKK proteins (ATM, ATR, PRKDC, mTOR, SMG1, and TRRAP), whose maturation depends on the TTT complex function,<sup>6–9</sup> suggesting that the *TELO2* mutations are not sufficient to disrupt their maturation under these conditions. However, with the stress of exposure of the cells to 17AAG, an inhibitor of HSP90, the levels of at least two of the PIKKs (ATM, PRKDC) were reduced in affected individuals' cells as compared to controls (Figure 3). This result suggests that the further reduction in the TTT complex provoked by 17AAG leads to secondary alterations in the levels of certain PIKKs. We hypothesize that such stresses might occur in certain cells at critical times in development and lead to the phenotypic features in these individuals. Alternatively, disruption of the TTT complex might have heretofore unidentified functions beyond stabilization of PIKK.

Current understanding of *TELO2* structure is based on a partial analysis of yeast *Tel2* structure<sup>49</sup> that shows *Tel2* to be a multi-helical protein in which pairs of  $\alpha$  helices align with each other to form suprahelical assemblies or  $\alpha$  solenoids, characteristic of helical repeat proteins. Yeast *Tel2* has 21 NTD  $\alpha$  helices and 11 CTD  $\alpha$  helices that assemble into NTD and CTD  $\alpha$  solenoids, respectively. NTD  $\alpha$  helices 15–21 are the most highly conserved structural motifs.<sup>49</sup> Pull-down experiments with yeast and mouse *TELO2* homologs indicate that the NTD  $\alpha$  solenoid interacts with TTI1 and TTI2.<sup>49</sup> The 688-residue yeast *Tel2* has 81 amino acid identities (11.8%) with the 837-residue human *TELO2* (9.9% in the 354-residue NTD and 15.8% in the 261-residue CTD). Although the five missense variants identified in the affected individuals described here all involve highly conserved residues, the consequences of these alterations on the overall structure and function of *TELO2* remain to be determined. The p.Cys367Phe variant identified in

families 1 and 2 falls in the middle of NTD  $\alpha$  helix 18, the region of the NTD  $\alpha$  solenoid thought to be involved with binding of TTI1. The p.Pro260Leu variant falls in the middle of the NTD  $\alpha$  helix 13. The remaining three missense variants (p.Arg609His, p.Asp720Val, and p.Val766Met) are all located in the CTD  $\alpha$  solenoid with only p.Arg609His directly involving an  $\alpha$  helix (helix number 29).

### The TTT Complex and Its Role in PIKK Maintenance

The TTT complex, R2TP and Hsp90 supercomplex is conserved in budding yeast, worms, and mammals.<sup>4,7,50–52</sup> Assembly of the TTT complex in yeast involves binding of the *Tel2* N-terminal domain (NTD) to Tti1 and Tti2.<sup>49</sup> Consistent with our observations, shRNA directed against each component of TTT complex results in reduced levels of the other two components, indicating that the three components depend on each other for stability.<sup>6</sup> In mouse, the interaction the TTT complex with Hsp90 and the R2TP complex involves a covalent linkage of phosphorylated residue Ser492 in *Tel2* to the Pih1 scaffold component of the R2TP complex and binding of the Tah1 component of R2TP to the homodimeric Hsp90.<sup>9,47</sup> The interaction of this supercomplex with the PIKKs is mediated by non-covalent binding of TTI1 in the TTT complex to the individual PIKKs.<sup>6</sup> Once the PIKKs have reached their active conformation, binding to the TTT complex does not appear to be required for their function.<sup>49</sup> The consequence of shRNA-mediated reduction in the levels of the individual components of the TTT complex is variable; reduction of TTI1 results in the most dramatic reduction in the PIKKs whereas a similar reduction in *TELO2* has the least consequence on the abundance of the PIKKs.<sup>6</sup> Moreover, loss of TTT complex function appears to have variable consequences on the abundance of each of the PIKKs, with ATM being most dramatically reduced.<sup>7</sup> Whether this property reflects differences in PIKK maturation and/or stability is not known. In general, the cellular consequences of disturbances in PIKK function have the potential to be broad, with abnormalities in DNA damage response, nutritional response, cell cycle progression, and gene expression. For example, in human osteosarcoma cells (U2OS cells), shRNA-induced reduction of the TTT complex to levels <25% of normal is associated with a corresponding reduction in PIKK abundance and checkpoint signaling.<sup>6</sup> The importance of these functions is shown by the early embryonic lethality of mouse embryos homozygous for *Telo2* knockout alleles and rapid senescence of MEFs made homozygous for *Telo2* deficiency.<sup>7</sup> This might be related to deficiency of one or more PIKKs alone or combined with other, yet to be determined, functions of *TELO2* or the TTT complex.

This model predicts that pathogenic variants in the genes encoding the other members of the TTT complex would have features similar to those with *TELO2* deficiency. In this regard, Najmabadi et al.<sup>53</sup> described two siblings with non-syndromic ID who were homozygous for a predicted damaging missense variant (p.Arg236His)



in *TTI2* (MIM: 614426), and Langouet et al.<sup>54</sup> reported three affected siblings with ID, short stature, dysmorphic features, and mild lymphocytopenia (MIM: 615541) who were homozygous for a variant in *TTI2* c.1307T>A (p.Ile436Asn). The latter variant was associated with decreased steady-state amounts of TTI2 and, secondarily, *TELO2* and *TTI1* to levels that were about 5% of normal in three affected individuals. The levels of ATM, PRKDC, and mTOR were also decreased in skin fibroblasts from these individuals. Finally, the supplementary material of Najmabadi et al.<sup>53</sup> also lists, as a candidate causative variant, a mutation in *TTI1* (MIM: 614425) that produces the missense change (p.Pro1020Thr) in a proband with non-syndromic ID.<sup>53</sup>

In summary, our results in affected individuals in four unrelated families indicate that loss-of-function variants in *TELO2* are responsible for a complex human phenotype that includes ID and various other features. The mechanism by which this occurs remains to be determined but could be due to reduced function of one or more of the PIKKs under developmental or to physiological circumstances not replicated in our cultured cell systems or through perturbation of some, as yet undescribed, function of the TTT complex. The former is supported by some overlap in the phenotypic features (ID, growth retardation, abnormal brain growth, movement disorders) of the individuals we describe here with those of individuals with Mendelian phenotypes of the PIKK genes: ataxia telangiectasia, Seckel syndrome 1, and immunodeficiency 26 with or without neurological abnormalities. Moreover, mTOR, another of the PIKKs, has been implicated in regulation of the local translation of dendritic mRNAs, a key aspect of dendrite and spine morphogenesis and synaptic plasticity,<sup>55</sup> and mutations in *MTOR* have recently been associated with ID and macrocephaly.<sup>21,22</sup> We speculate reduction of TTT complex function secondary to *TELO2* variants in certain cells and/or developmental stages resulting in a more global but less individually severe dysfunction of the PIKKs as compared to their isolated monogenic deficiency. Alternatively, there might be additional as yet unknown function(s) of *TELO2* and the TTT complex that are perturbed in these individuals and account for their phenotype.

### Supplemental Data

Supplemental Data include seven figures and supplemental case reports and can be found with this article online at <http://dx.doi.org/10.1016/j.ajhg.2016.03.014>.

### Acknowledgments

We are grateful for the families who participated in this study. This work was supported by the NHGRI grant 1U54HG006542 to the Baylor-Hopkins Center for Mendelian Genomics (D.V.), RO1CA160433, and the Commonwealth Foundation (to M.A.). J.Y., D. Gable, and J.J. are trainees of the Predoctoral Training Program in Human Genetics at Johns Hopkins University and are supported by the NIH training grant T32GM07814.

Received: September 22, 2015

Accepted: March 15, 2016

Published: April 28, 2016

### Web Resources

1000 Genomes, <http://browser.1000genomes.org>  
Baylor-Hopkins Center for Mendelian Genomics, <https://mendeliangenomics.org/>  
dbSNP, <http://www.ncbi.nlm.nih.gov/projects/SNP/>  
ExAC Browser, <http://exac.broadinstitute.org/>  
GATK resources, <https://www.broadinstitute.org/gatk/guide/article?id=1247>  
GeneMatcher, <https://genematcher.org/>  
NHLBI Exome Sequencing Project (ESP) Exome Variant Server, <http://evs.gs.washington.edu/EVS/>  
OMIM, <http://www.omim.org/>  
Picard, <http://broadinstitute.github.io/picard/>  
PolyPhen-2 v.2.2.2, <http://genetics.bwh.harvard.edu/pph2/>  
RefSeq, <http://www.ncbi.nlm.nih.gov/RefSeq>  
RRID, <https://scicrunch.org/resources>  
SIFT v.1.03, <http://sift.bii.a-star.edu.sg/>

### References

1. Schallock, R.L., Luckasson, R.A., Shogren, K.A., Borthwick-Duffy, S., Bradley, V., Buntinx, W.H., Coulter, D.L., Craig, E.M., Gomez, S.C., Lachapelle, Y., et al. (2007). The renaming of mental retardation: understanding the change to the term intellectual disability. *Intellect. Dev. Disabil.* **45**, 116–124.
2. Ropers, H.H. (2010). Genetics of early onset cognitive impairment. *Annu. Rev. Genomics Hum. Genet.* **11**, 161–187.
3. Musante, L., and Ropers, H.H. (2014). Genetics of recessive cognitive disorders. *Trends Genet.* **30**, 32–39.
4. Lustig, A.J., and Petes, T.D. (1986). Identification of yeast mutants with altered telomere structure. *Proc. Natl. Acad. Sci. USA* **83**, 1398–1402.
5. Runge, K.W., and Zakian, V.A. (1996). TEL2, an essential gene required for telomere length regulation and telomere position effect in *Saccharomyces cerevisiae*. *Mol. Cell. Biol.* **16**, 3094–3105.
6. Hurov, K.E., Cotta-Ramusino, C., and Elledge, S.J. (2010). A genetic screen identifies the Triple T complex required for DNA damage signaling and ATM and ATR stability. *Genes Dev.* **24**, 1939–1950.
7. Takai, H., Wang, R.C., Takai, K.K., Yang, H., and de Lange, T. (2007). Tel2 regulates the stability of PI3K-related protein kinases. *Cell* **131**, 1248–1259.
8. Kakiyama, Y., and Houry, W.A. (2012). The R2TP complex: discovery and functions. *Biochim. Biophys. Acta* **1823**, 101–107.
9. Pal, M., Morgan, M., Phelps, S.E., Roe, S.M., Parry-Morris, S., Downs, J.A., Polier, S., Pearl, L.H., and Prodromou, C. (2014). Structural basis for phosphorylation-dependent recruitment of Tel2 to Hsp90 by Pih1. *Structure* **22**, 805–818.
10. Abraham, R.T. (2001). Cell cycle checkpoint signaling through the ATM and ATR kinases. *Genes Dev.* **15**, 2177–2196.
11. Kastan, M.B., and Bartek, J. (2004). Cell-cycle checkpoints and cancer. *Nature* **432**, 316–323.
12. Woodbine, L., Neal, J.A., Sasi, N.-K., Shimada, M., Deem, K., Coleman, H., Dobyns, W.B., Ogi, T., Meek, K., Davies, E.G., and Jeggo, P.A. (2013). PRKDC mutations in a SCID patient

- with profound neurological abnormalities. *J. Clin. Invest.* *123*, 2969–2980.
13. Wullschlegel, S., Loewith, R., and Hall, M.N. (2006). TOR signaling in growth and metabolism. *Cell* *124*, 471–484.
  14. Conti, E., and Izaurralde, E. (2005). Nonsense-mediated mRNA decay: molecular insights and mechanistic variations across species. *Curr. Opin. Cell Biol.* *17*, 316–325.
  15. Yamashita, A., Ohnishi, T., Kashima, I., Taya, Y., and Ohno, S. (2001). Human SMG-1, a novel phosphatidylinositol 3-kinase-related protein kinase, associates with components of the mRNA surveillance complex and is involved in the regulation of nonsense-mediated mRNA decay. *Genes Dev.* *15*, 2215–2228.
  16. Herceg, Z., and Wang, Z.Q. (2005). Rendez-vous at mitosis: TRRAPed in the chromatin. *Cell Cycle* *4*, 383–387.
  17. McMahon, S.B., Van Buskirk, H.A., Dugan, K.A., Copeland, T.D., and Cole, M.D. (1998). The novel ATM-related protein TRRAP is an essential cofactor for the c-Myc and E2F oncoproteins. *Cell* *94*, 363–374.
  18. Sandoval, N., Platzer, M., Rosenthal, A., Dörk, T., Bendix, R., Skawran, B., Stuhmann, M., Wegner, R.D., Sperling, K., Banin, S., et al. (1999). Characterization of ATM gene mutations in 66 ataxia telangiectasia families. *Hum. Mol. Genet.* *8*, 69–79.
  19. Shanske, A., Caride, D.G., Menasse-Palmer, L., Bogdanow, A., and Marion, R.W. (1997). Central nervous system anomalies in Seckel syndrome: report of a new family and review of the literature. *Am. J. Med. Genet.* *70*, 155–158.
  20. van der Burg, M., Ijspeert, H., Verkaik, N.S., Turul, T., Wiegant, W.W., Morotomi-Yano, K., Mari, P.O., Tezcan, I., Chen, D.J., Zdzienicka, M.Z., et al. (2009). A DNA-PKcs mutation in a radiosensitive T-B-SCID patient inhibits Artemis activation and nonhomologous end-joining. *J. Clin. Invest.* *119*, 91–98.
  21. Baynam, G., Overkov, A., Davis, M., Mina, K., Schofield, L., Allcock, R., Laing, N., Cook, M., Dawkins, H., and Goldblatt, J. (2015). A germline MTOR mutation in Aboriginal Australian siblings with intellectual disability, dysmorphism, macrocephaly, and small thoraces. *Am. J. Med. Genet. A.* *167*, 1659–1667.
  22. Smith, L.D., Saunders, C.J., Dinwiddie, D.L., Altherton, A.M., Miller, N.A., Soden, S.E., Farrow, E.G., Abdelmoity, A.T., and Kingsmore, S.F. (2013). Exome sequencing reveals de novo germline mutation of the mammalian target of rapamycin (MTOR) in a patient with megalencephaly and intractable seizures. *J. Genomes Exomes* *2*, 63–72.
  23. Guertin, D.A., and Sabatini, D.M. (2007). Defining the role of mTOR in cancer. *Cancer Cell* *12*, 9–22.
  24. Wei, X., Walia, V., Lin, J.C., Teer, J.K., Prickett, T.D., Gartner, J., Davis, S., Stemke-Hale, K., Davies, M.A., Gershenwald, J.E., et al.; NISC Comparative Sequencing Program (2011). Exome sequencing identifies GRIN2A as frequently mutated in melanoma. *Nat. Genet.* *43*, 442–446.
  25. Nikiforov, M.A., Chandriani, S., Park, J., Kotenko, I., Matheos, D., Johnsson, A., McMahon, S.B., and Cole, M.D. (2002). TRRAP-dependent and TRRAP-independent transcriptional activation by Myc family oncoproteins. *Mol. Cell. Biol.* *22*, 5054–5063.
  26. Herceg, Z., Hulla, W., Gell, D., Cuenin, C., Leonart, M., Jackson, S., and Wang, Z.Q. (2001). Disruption of Trrap causes early embryonic lethality and defects in cell cycle progression. *Nat. Genet.* *29*, 206–211.
  27. Sobreira, N., Schiettecatte, F., Boehm, C., Valle, D., and Hamosh, A. (2015). New tools for Mendelian disease gene identification: PhenoDB variant analysis module; and GeneMatcher, a web-based tool for linking investigators with an interest in the same gene. *Hum. Mutat.* *36*, 425–431.
  28. Li, H., and Durbin, R. (2009). Fast and accurate short read alignment with Burrows-Wheeler transform. *Bioinformatics* *25*, 1754–1760.
  29. McKenna, A., Hanna, M., Banks, E., Sivachenko, A., Cibulskis, K., Kernytzky, A., Garimella, K., Altshuler, D., Gabriel, S., Daly, M., and DePristo, M.A. (2010). The Genome Analysis Toolkit: a MapReduce framework for analyzing next-generation DNA sequencing data. *Genome Res.* *20*, 1297–1303.
  30. DePristo, M.A., Banks, E., Poplin, R., Garimella, K.V., Maguire, J.R., Hartl, C., Philippakis, A.A., del Angel, G., Rivas, M.A., Hanna, M., et al. (2011). A framework for variation discovery and genotyping using next-generation DNA sequencing data. *Nat. Genet.* *43*, 491–498.
  31. Altshuler, D.M., Gibbs, R.A., Peltonen, L., Altshuler, D.M., Gibbs, R.A., Peltonen, L., Dermitzakis, E., Schaffner, S.F., Yu, F., Peltonen, L., et al.; International HapMap 3 Consortium (2010). Integrating common and rare genetic variation in diverse human populations. *Nature* *467*, 52–58.
  32. Zhang, L., Jie, C., Obie, C., Abidi, F., Schwartz, C.E., Stevenson, R.E., Valle, D., and Wang, T. (2007). X chromosome cDNA microarray screening identifies a functional PLP2 promoter polymorphism enriched in patients with X-linked mental retardation. *Genome Res.* *17*, 641–648.
  33. Hubbard, T.J., Aken, B.L., Ayling, S., Ballester, B., Beal, K., Bragin, E., Brent, S., Chen, Y., Clapham, P., Clarke, L., et al. (2009). Ensembl 2009. *Nucleic Acids Res.* *37*, D690–D697.
  34. Abecasis, G.R., Auton, A., Brooks, L.D., DePristo, M.A., Durbin, R.M., Handsaker, R.E., Kang, H.M., Marth, G.T., and McVean, G.A.; 1000 Genomes Project Consortium (2012). An integrated map of genetic variation from 1,092 human genomes. *Nature* *491*, 56–65.
  35. Abecasis, G.R., Altshuler, D., Auton, A., Brooks, L.D., Durbin, R.M., Gibbs, R.A., Hurles, M.E., McVean, G.A., and McVean, G.A.T.; 1000 Genomes Project Consortium (2010). A map of human genome variation from population-scale sequencing. *Nature* *467*, 1061–1073.
  36. Baerlocher, G.M., Vulto, I., de Jong, G., and Lansdorp, P.M. (2006). Flow cytometry and FISH to measure the average length of telomeres (flow FISH). *Nat. Protoc.* *1*, 2365–2376.
  37. Auerbach, A.D. (2015). Diagnosis of Fanconi anemia by diepoxybutane analysis. *Curr. Protoc. Hum. Genet.* *85*, 1–17.
  38. Penno, M.B., Pedrotti-Krueger, M., and Ray, T. (1993). Cryopreservation of whole blood and isolated lymphocytes for B-cell immortalization. *J. Tiss. Cult. Meth.* *15*, 43–48.
  39. Sun, X., Becker-Catania, S.G., Chun, H.H., Hwang, M.J., Huo, Y., Wang, Z., Mitui, M., Sanal, O., Chessa, L., Crandall, B., and Gatti, R.A. (2002). Early diagnosis of ataxia-telangiectasia using radiosensitivity testing. *J. Pediatr.* *140*, 724–731.
  40. Pinto, F.O., Leblanc, T., Chamousset, D., Le Roux, G., Brethon, B., Cassinat, B., Larghero, J., de Villartay, J.P., Stoppa-Lyonnet, D., Baruchel, A., et al. (2009). Diagnosis of Fanconi anemia in patients with bone marrow failure. *Haematologica* *94*, 487–495.
  41. Izumi, N., Yamashita, A., Hirano, H., and Ohno, S. (2012). Heat shock protein 90 regulates phosphatidylinositol 3-kinase-related protein kinase family proteins together with the RUVBL1/2 and Tel2-containing co-factor complex. *Cancer Sci.* *103*, 50–57.
  42. Larkin, M.A., Blackshields, G., Brown, N.P., Chenna, R., McGettigan, P.A., McWilliam, H., Valentin, F., Wallace, I.M.,

- Wilm, A., Lopez, R., et al. (2007). Clustal W and Clustal X version 2.0. *Bioinformatics* 23, 2947–2948.
43. Sherry, S.T., Ward, M.-H., Kholodov, M., Baker, J., Phan, L., Smigielski, E.M., and Sirotkin, K. (2001). dbSNP: the NCBI database of genetic variation. *Nucleic Acids Res.* 29, 308–311.
44. Adzhubei, I.A., Schmidt, S., Peshkin, L., Ramensky, V.E., Gerasimova, A., Bork, P., Kondrashov, A.S., and Sunyaev, S.R. (2010). A method and server for predicting damaging missense mutations. *Nat. Methods* 7, 248–249.
45. Sim, N.-L., Kumar, P., Hu, J., Henikoff, S., Schneider, G., and Ng, P.C. (2012). SIFT web server: predicting effects of amino acid substitutions on proteins. *Nucleic Acids Res.* 40, W452–W457.
46. Kumar, P., Henikoff, S., and Ng, P.C. (2009). Predicting the effects of coding non-synonymous variants on protein function using the SIFT algorithm. *Nat. Protoc.* 4, 1073–1081.
47. Horejsí, Z., Takai, H., Adelman, C.A., Collis, S.J., Flynn, H., Maslen, S., Skehel, J.M., de Lange, T., and Boulton, S.J. (2010). CK2 phospho-dependent binding of R2TP complex to TEL2 is essential for mTOR and SMG1 stability. *Mol. Cell* 39, 839–850.
48. Kaizuka, T., Hara, T., Oshiro, N., Kikkawa, U., Yonezawa, K., Takehana, K., Iemura, S., Natsume, T., and Mizushima, N. (2010). Tti1 and Tel2 are critical factors in mammalian target of rapamycin complex assembly. *J. Biol. Chem.* 285, 20109–20116.
49. Takai, H., Xie, Y., de Lange, T., and Pavletich, N.P. (2010). Tel2 structure and function in the Hsp90-dependent maturation of mTOR and ATR complexes. *Genes Dev.* 24, 2019–2030.
50. Hartman, P.S., and Herman, R.K. (1982). Radiation-sensitive mutants of *Caenorhabditis elegans*. *Genetics* 102, 159–178.
51. Lakowski, B., and Hekimi, S. (1996). Determination of lifespan in *Caenorhabditis elegans* by four clock genes. *Science* 272, 1010–1013.
52. Shikata, M., Ishikawa, F., and Kanoh, J. (2007). Tel2 is required for activation of the Mrc1-mediated replication checkpoint. *J. Biol. Chem.* 282, 5346–5355.
53. Najmabadi, H., Hu, H., Garshasbi, M., Zemojtel, T., Abedini, S.S., Chen, W., Hosseini, M., Behjati, F., Haas, S., Jamali, P., et al. (2011). Deep sequencing reveals 50 novel genes for recessive cognitive disorders. *Nature* 478, 57–63.
54. Langouët, M., Saadi, A., Rieunier, G., Moutton, S., Siquier-Pernet, K., Fernet, M., Nitschke, P., Munnich, A., Stern, M.H., Chaouch, M., and Colleaux, L. (2013). Mutation in TTI2 reveals a role for triple T complex in human brain development. *Hum. Mutat.* 34, 1472–1476.
55. Troca-Marín, J.A., Casañas, J.J., Benito, I., and Montesinos, M.L. (2014). The Akt-mTOR pathway in Down's syndrome: the potential use of rapamycin/rapalogs for treating cognitive deficits. *CNS Neurol. Disord. Drug Targets* 13, 34–40.



**The American Journal of Human Genetics, Volume 98**

**Supplemental Data**

**A Syndromic Intellectual Disability Disorder  
Caused by Variants in *TELO2*, a Gene Encoding  
a Component of the TTT Complex**

**Jing You, Nara L. Sobreira, Dustin L. Gable, Julie Jurgens, Dorothy K. Grange, Newell Belnap, Ashley Siniard, Szabolcs Szelinger, Isabelle Schrauwen, Ryan F. Richholt, Stephanie E. Vallee, Mary Beth P. Dinulos, David Valle, Mary Armanios, and Julie Hoover-Fong**

## Supplemental Materials

### Case Reports

**Family 1:** Individuals II-2 and II-3 (17 year old, male and female, respectively) are fraternal twins (see Figure 1) born to a 21 year old mother by vaginal delivery following a 35 week pregnancy complicated by preeclampsia. Against normative birth parameters for twin gestation, birth weights were 1.9 kg (10-25%) and 1.7 kg (5-10%), respectively, and birth lengths were 43.8 cm (25%) and 38.7 cm (<3%). Individual II-2 had 'low' Apgar scores and remained hospitalized for 2-1/2 weeks due to poor feeding and apnea. Individual II-3 had poor respiratory effort at birth and required resuscitation for 15 minutes with 'low' Apgar scores. A cleft palate and shrill cry were noted after her resuscitation and she remained hospitalized for 1.5 months with nasogastric tube feeding. Individual II-4 was born at term with birth weight of 2.8 kg (10-25%) and birth length 47.0 cm (25%) and discharged at 1 week with difficulty feeding and hypotonia. He had 1<sup>o</sup> hypospadias and failed his newborn hearing screen.

From infancy, individual II-2 had symmetrical poor growth and delayed development. He sat independently at 2 years, crawled at 3 years and stood at 4 years, but was wheelchair-dependent by mid-childhood due to impaired balance that has become more pronounced with age. At 17 years, he can hold a pencil or utensil but is unable to write or feed himself independently. He occasionally uses single words, rarely makes eye contact, and is described as 'distant and withdrawn' except in the evenings, when his behavior changes dramatically to uncontrollable laughing and hugging. While awake,

his body is constantly moving without purpose but without overt tremor or chorea.

There has been slow acquisition but no regression of skills. He was born with a patent ductus arteriosus (PDA) and a ventricular septal defect (VSD). Both closed spontaneously, but he also was found to have a double aortic arch with vascular ring and cleft mitral valve with mitral regurgitation. Thus far, no cardiac surgery has been required. He has bilateral hearing loss and cortical visual impairment (CVI). A comprehensive, dilated ophthalmologic exam at 17 years of age revealed grossly normal eye structure, but visual acuity could not be assessed due to poor tracking/jerky pursuits and no compliance. He was diagnosed with autism in late childhood, based on no language or communication and repetitive, self-stimulatory movements.

Hypothyroidism was diagnosed at 15 years. Upon examination at age 17 years, weight was 28.7 kg (-7.6 SD), height 130.4 cm (-5.6 SD) and OFC 48.0 cm (<<3%; 50% for 1.5 years). He has brittle hair, blue sclera, dark circles under his eyes, an intact palate, pectus carinatum, decreased elbow extension but otherwise joint laxity, broad great toes with 4/5 toe syndactyly, eczema, and generalized hypotonia with spasticity. He has sparse facial and pubic hair. Prior to enrollment for research WES, he had several normal tests and studies including: brain MRI (2 years of age), comparative genomic hybridization (10 years), EEG (12 years), serum uric acid, and molecular testing for fragile X.

Individual II-3 also experienced symmetric poor overall growth after birth associated with delayed development without regression. She sat independently at 5 years of age



and has never walked, but can stand with support. She has no words but makes sounds to communicate. She is the most attentive to her environment of the three affected children in Family 1. She often exhibits hand flapping when she is frustrated, throws herself back into her wheelchair when she is angry, and has an affinity for water. Her cleft palate was repaired at 14 months and she required a frenulectomy for ankyloglossia at 3 years of age. She required multiple sets of typanostomy tubes for otitis media. In early childhood, she was found to have a double aortic arch with an atretic left arch creating an incomplete vascular ring impinging on the upper esophagus but not the trachea. Her medical course was complicated by severe gastrointestinal reflux disease and recurrent episodes of aspiration pneumonia that diminished following G-tube placement at age 12 years. She has bilateral hearing loss and CVI. On exam at 12 and 1/3 years, her height was 108.5 cm (-6.1 SD), weight 18.1 kg (-6.6 SD), and OFC 47.0 cm (<<3%, 50% for 1.5 years). She had synophrys, blue sclera, up-slanting palpebral fissures, downturned mouth, large tongue with tethered sublingual frenulum, torticollis, pectus excavatum, anteriorly placed rectum, brachydactyly (middle digit << 3%ile), 4/5 toe syndactyly, joint laxity, and generalized hypotonia. She, too, is in constant motion while awake with spasticity in her lower extremities. She has rotatory nystagmus. Prior to enrollment in this research, she had multiple normal clinical studies including: karyotype, subtelomere and 22q11 FISH, 7 dehydrocholesterol levels, and BAC array (4,000 probes).

Following birth, individual II-4 remained in hospital for difficulty feeding and hypotonia until age 1 week. His exam was notable for hypospadias. He sat at 15 months but has never ambulated. He failed his newborn hearing screen and all subsequent hearing tests, and has no speech. Based on his behavior, it is thought that he also has CVI. He was noted to have an accessory oral frenuli and coarctation of the aorta. On exam at age 9 years, he was symmetrically small with height 100.4 cm (-5.9 SD), weight 15.1 kg (-6.3 SD) and OFC 46.5 cm (<<3% for 1 year). He had blue sclera, a large mouth with thin upper lip, loose joints, hypotonia, brachydactyly and 5<sup>th</sup> finger clinodactyly. He exhibited self-injurious behavior during the exam with constant motor movement and no words. He had 3+ patellar reflexes but no spasticity.

**Family 2:**

Individual II-2 is a 5 year old white female who was born at term after an uncomplicated pregnancy. She was delivered vaginally to a 30 year old, gravida 2, para 1 woman. Her birth weight was 3.71 kg (50%); length 50.8 cm (60%); and OFC 35 cm (60%). Concerns regarding delayed development began at 2 months. She rolled over at 5 months, sat alone at 8 months, and walked at 14 months. At 20 months she knew about 20 words, but her parents felt her verbal skills regressed. A hearing test at 2 years of age was normal. At age 30 months, she had formal testing using the Developmental Assessment of Young Children (DAYC-2) test with a developmental quotient (DQ) of 55 in expressive and language skills, 40 in fine and gross motor skills, 40 in social skills and 37 in cognition. She was re-tested at age 60 months and scored <50 in all domains.

She had a normal cranial MRI at age 2 and strabismus surgery at age 3.5 years for intermittent esotropia. She has had a chronic sleep disturbance with difficulty falling asleep and often stayed awake screaming during the night. An EEG at age 3 and 10/12 showed slightly slow background activity with 2 brief bursts of bifrontal epileptiform activity. There have been no clinically detectable seizures.

Physical exam at age 4 and 9/12 revealed a height of 106 cm (50%), a weight of 16.8 kg (45%), and a head circumference of 47.5 cm (<3%, 50% for 18 months). She was non-dysmorphic and ambulatory with intermittent abnormal truncal movements.

Examination of her chest, spine, heart and abdomen was normal as were her deep tendon reflexes.

Pertinent laboratory testing included normal chemistries; normal 15q methylation testing for Prader Willi syndrome and Angelman syndrome; normal *MECP2* sequencing and deletion/duplication testing; normal transferrin isoelectric focusing for carbohydrate deficient transferrin; normal creatine disorders panel; and normal urine purines and pyrimidines.

### **Family 3:**

Individual II-1 is a 17 year old female who was born at 37.5 weeks of gestation after an uncomplicated pregnancy. She was delivered with vacuum and forceps assistance due

to unspecified dystocia. Birth weight is unknown and Apgar scores were reported as “low”. She had poor respiratory effort and was observed in the NICU for several hours but discharged at 2 days of age. Her parents noted slow acquisition of milestones. She sat independently at 2 years, never developed words to communicate, can assist with transfers from chair to floor but cannot stand or walk independently. She has not had formal psychometrics but currently (age 17) she is non-ambulatory, non-verbal, and incontinent and performs no activities of daily living. Formal audiology assessment in early childhood was normal. She is in special school 4 hours a day and has an irregular sleep pattern. On occasions, she does not sleep at night for several days. She has nighttime outbursts of laughing if she is awake for prolonged periods.

Seizures began in early childhood and, currently, she experiences absence, partial complex and generalized tonic clonic seizures. At times the frequency has been as high as 20 or 30 per day, but currently she has ~6 per month on Trileptal and clonazepam. She has kyphoscoliosis with progressive vertebral deformation, which began in mid-childhood. Her kyphoscoliosis worsened in puberty in association with a linear growth spurt.

At age 15, she had a routine echocardiogram and lab work in preparation for possible spine surgery. Her parents were told her cardiac function was sufficient to tolerate the surgery but are unaware if any structural anomalies were noted. There were no specific pre-operative laboratory abnormalities other than low vitamin D and anemia. The

former has been treated with supplemental oral vitamin D (50,000 IU weekly) and the latter with oral iron, though the anemia was reported to be minimally responsive.

On exam at age 17 years of age, her head circumference is 51cm (<3%, 50% for 7 years old). Her face is expressionless with slightly elongated palpebral fissures and she holds her tongue outside her mouth. Her neck and thorax are grossly normal with normal breast development. She has small hands with wasting of her peripheral muscles. Her hearing is grossly normal. She tracks people moving around her and can 'spot' small toys or objects. She avoids eye contact and has difficulty reaching objects with a shaky, poor grasp.

**Family 4:**

Individual II-1 is an 8 year old white male who was the 45.7 cm (<3%) and 3.09 kg (25%) product of a 38 week, uncomplicated pregnancy and delivery. Apgar scores were 9 at 1 and 5 minutes. He required phototherapy for hyperbilirubinemia but was discharged at age 5 days. Development was slow: he sat at 12 months, crawled at 3 years, and walked at 4 years. There has been no regression. He has dysphagia with difficulty swallowing thin liquids and chronic respiratory congestion. He required a frenulectomy, multiple tympanostomy tubes for chronic otitis media and unilateral nasolacrimal duct probing for an obstructed tear duct. He developed kyphoscoliosis in childhood and is non-verbal. He has CVI and a movement disorder diagnosed as ataxia by consulting neurologists. Multiple cranial MRIs have been read as normal except for small brain size. He has not

had seizures and an EEG at age 7.5 was negative. His physical exam at age 7 years 9 months was remarkable for short stature (height 113.5cm, 1 %), small size (weight 20.6kg, 8%) and OFC 47cm (<<3%, 50% of 1 year). HEENT exam was remarkable for downslanting palpebral fissures; a scar on his right upper eyelid from surgical repair of trauma; short, smooth philtrum; broad nasal bridge; and a chronically open mouth. Chest, cardiovascular and abdominal exams were normal. He had a small penis with mild chordee. His tone was mildly increased in his lower extremities with normal deep tendon reflexes and abnormal coordination with ataxia. An echocardiogram at 8 years of age was normal with no abnormalities of the great vessels.

Pertinent laboratory testing included normal chemistries and plasma amino acids; normal 15q methylation testing for Prader Willi syndrome and *UBE3A* sequencing for Angelman syndrome; normal *NIPBL* sequencing for Cornelia de Lange syndrome 1; normal *MECP2* sequencing; normal 7-dehydrocholesterol and uric acid levels; normal transferrin isoelectric focusing for carbohydrate deficient transferrin; and normal Fragile X testing. His karyotype was 46, XY and a chromosomal microarray revealed a heterozygous 40kb deletion at 22q12.3 that removed segments of *C22orf42* and *RFLP2*. His asymptomatic mother has the same copy number variant.



Supplemental Data  
Figure S1

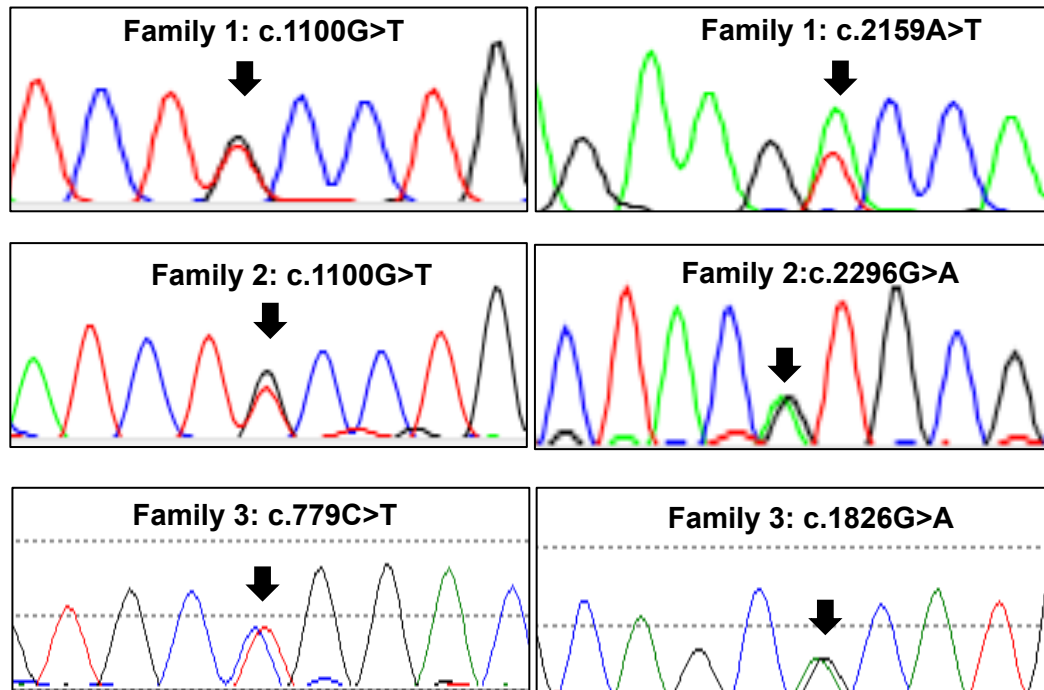

**Figure S1.**

**Sequence of *TELO2* variants in Family 1 (II-3, II-4 and II-5), Family 2 (II-2) and Family 3 (II-1).**

Family.1: *TELO2*, p.Cys367Phe (c.1100G>T) in exon 8 and p.Asp720Val (c.2159A>T) in exon 18.

Family.2: *TELO2*, p.Cys367Phe (c.1100G>T) in exon 8 and p.Val766Met (c.2296G>A) in exon 20.

Family.3: *TELO2*, p.Pro260Leu (c.779C>T) in exon 5 and p.Arg609His (c.1826G>A) in exon 15.

Figure S2

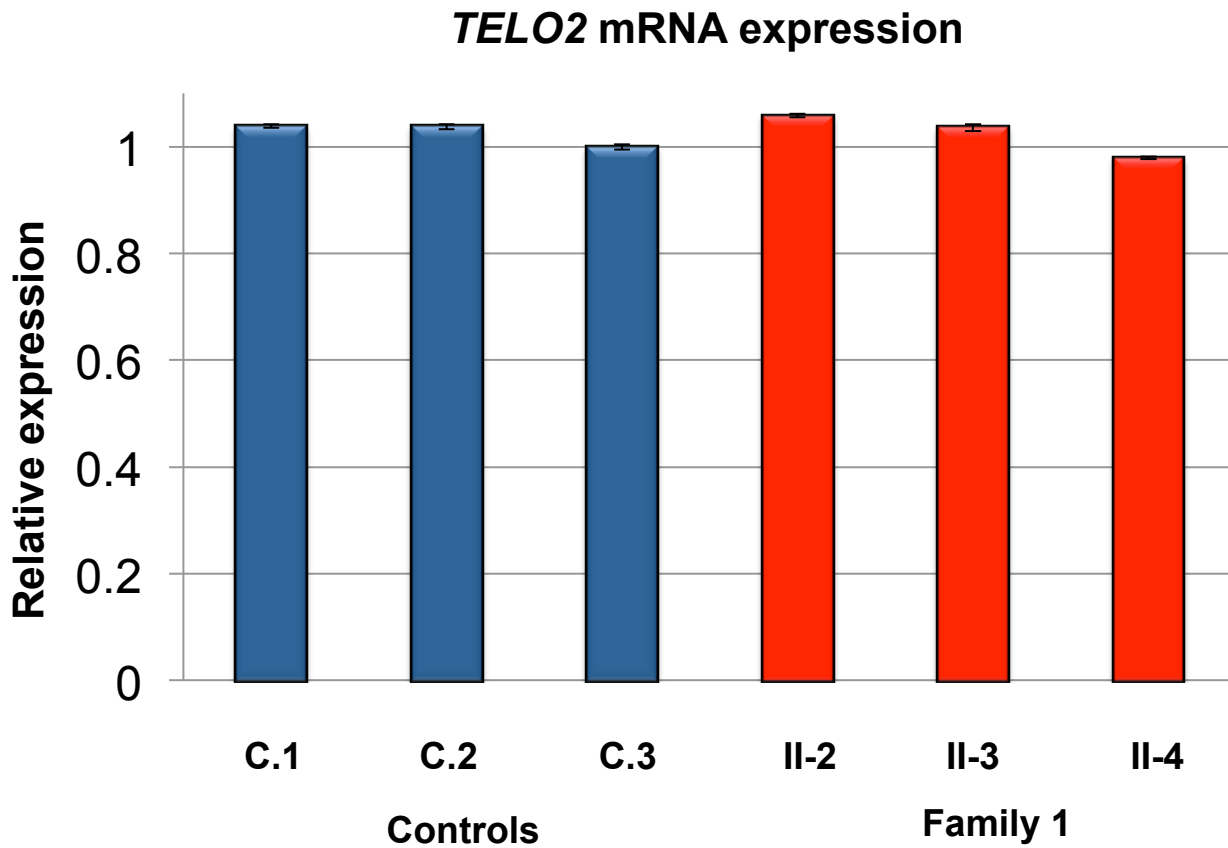

**Figure S2. Comparison of *TELO2* mRNA expression in affected individuals from Family 1 and controls**

Levels of *TELO2* mRNA are within normal range in RNA extracted from primary affected individual-derived fibroblast cell lines in Family 1 (II-2, II-3 and II-4) (n=3 experiments, performed in triplicate; error bars indicate 1 SEM, Student's t-test)

Figure S3

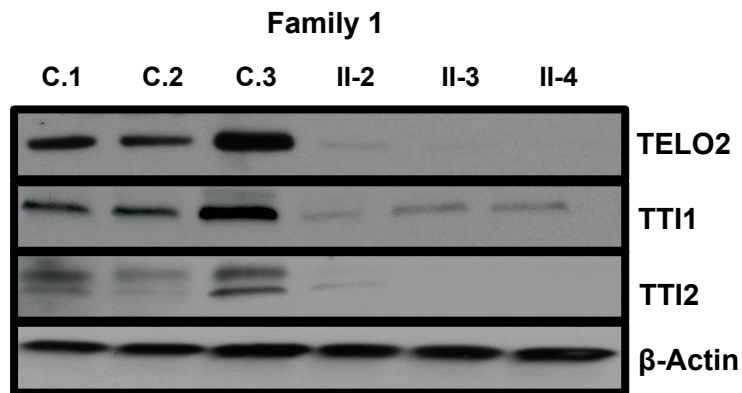

**Figure S3. Repeated western blot of steady state expression of TTT complex in fibroblasts extracts in the affected individuals of Family 1 (II-2, II-3 and II-4) and three normal controls (C.1, C.2 and C.3).**

Figure S4

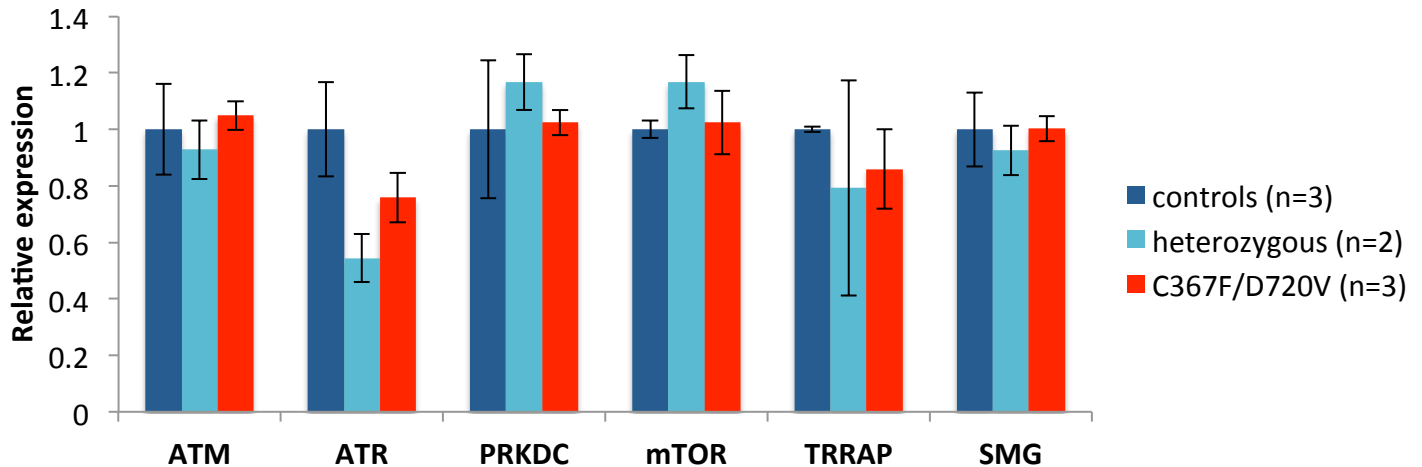

**Figure S4. Steady state expression of PIKKs in LCL extracts in the affected individuals of Family 1 (II-2, II-3 and II-4), their heterozygous parents (I-1 and I-2) and three normal controls (C.1, C.2 and C.3).**

There was no significant difference between control, affected individuals and heterozygous parents (Student's t-test).

Figure S5

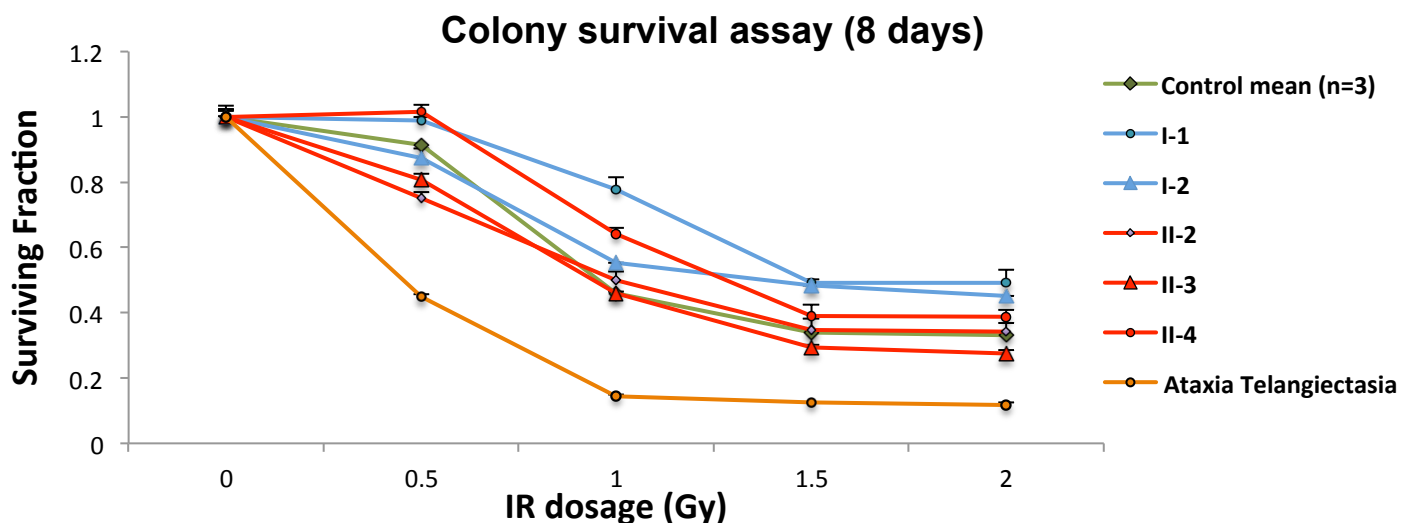

**Figure S5. Colony survival assay following exposure to ionizing irradiation.**

LCLs from affected individuals in Family 1 (II-2, II-3 and II-4) are labeled in red and the mean of three controls is labeled in green. LCLs from an affected individual with molecularly confirmed ataxia-telangiectasia (*ATM* nonsense variant) was used as a positive control.

Figure S6

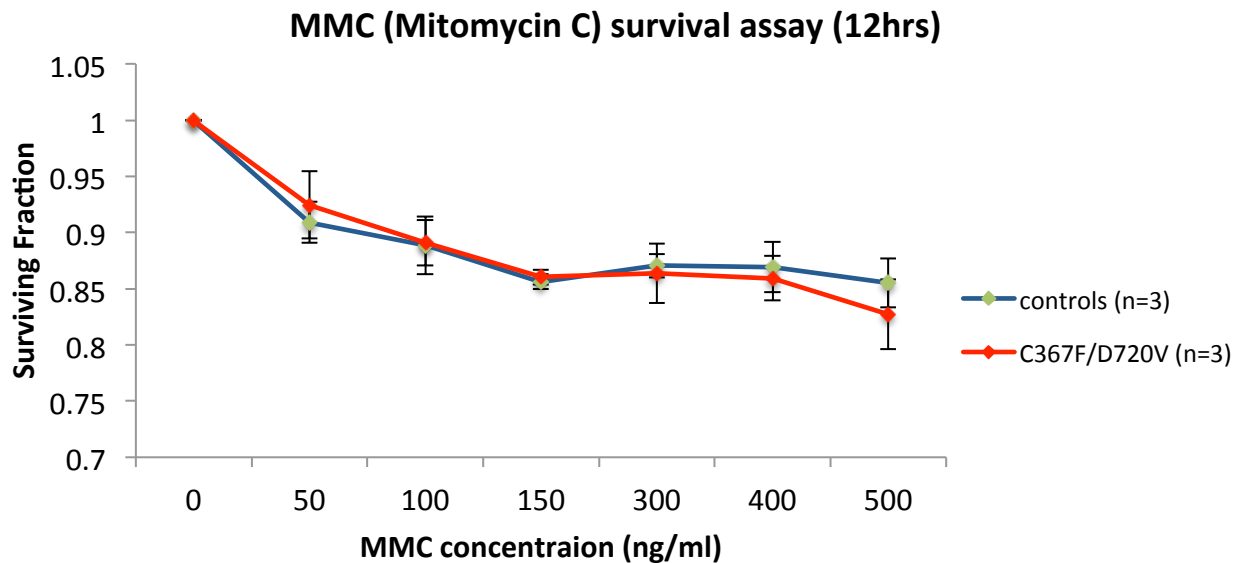

**Figure S6. Mitomycin C (MMC) survival assay**

Cultured skin fibroblasts from affected individuals in Family 1 (II-2, II-3 and II-4) and controls were used to measure the survival fraction following MMC treatment. The assay was performed in triplicate, and the plot shows the means of the 3 affected individuals and the 3 controls. There was no significant difference between controls and affected individuals in survival fraction to MMC treatment (Student's t-test).

Figure S7

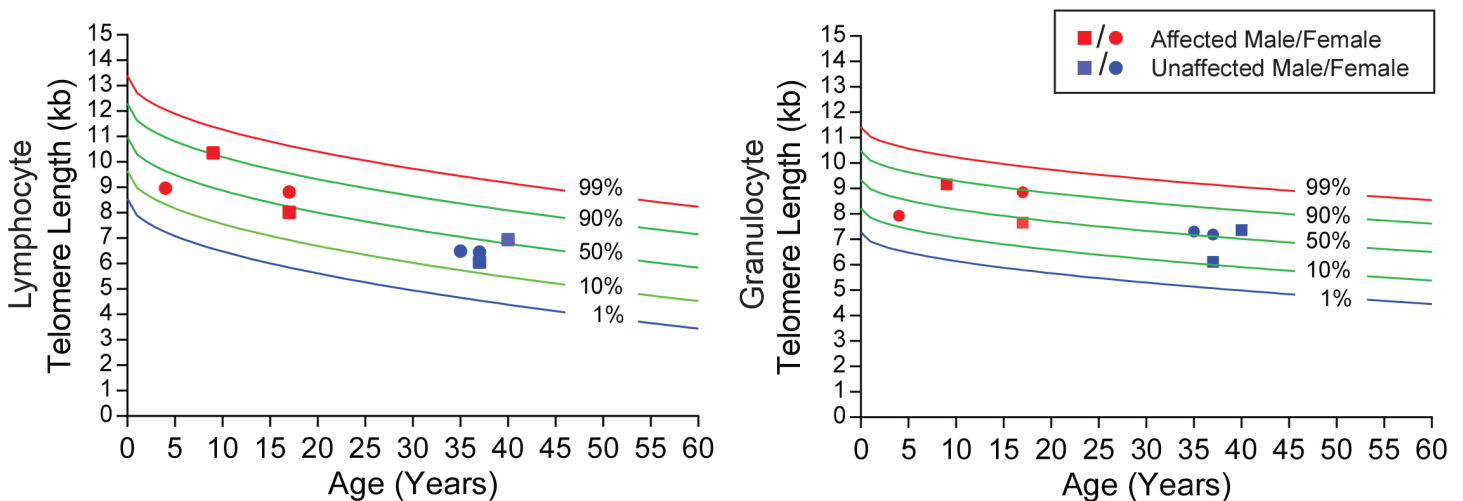

**Figure S7. Telomere length measurement in affected individuals' primary lymphocytes and granulocytes.**

The percentile lines are derived from 200 normal controls. Affected individuals and heterozygous parents from Families 1 and 2 were measured.
